# Supplementary material
Source: publisher site journal article supplement (https://www.dovepress.com/article/586045)
Supplement: Supplementary file 1 [file 586045%20Supplementary%20Material.docx]

**Supplementary tables**

## **Table S1.** Summary of GWAS Datasets Used for Mendelian Randomization Analysis.

| **Outcome** | **Year** | **GWAS ID** | **Population** | **Sample size** | |
| --- | --- | --- | --- | --- | --- |
| **Cases** | **Controls** |
| Polycystic ovarian syndrome | 2021 | finn-b-E4_POCS | European | 642 | 118,228 |
| Diabetes | 2021 | ebi-a-GCST90038633 | European | 24,659 | 459,939 |
| Body mass index | 2018 | ukb-b-19953 | European | 461,460 | |
| Ever used hormone-replacement therapy | 2018 | ukb-b-18541 | European | 97,920 | 152,381 |
| Ever taken oral contraceptive pill | 2018 | ukb-b-9509 | European | 205,516 | 44,924 |
| Venous thromboembolism | 2021 | finn-b-I9_VTE | European | 9,176 | 209,616 |

## **Table S2.** Genetic variants used as instrumental variables for Mendelian Randomization analysis.

| **SNP** | **Chr** | **Position** | **Effect allele** | **Other allele** | **Beta** | **SE** | **EAF** | **F** |
| --- | --- | --- | --- | --- | --- | --- | --- | --- |
| rs11896747 | 2 | 43537259 | A | G | -0.180195 | 0.0302127 | 0.527468 | 35.57184535 |
| rs16848751 | 2 | 212524622 | A | G | 0.224265 | 0.0311343 | 0.34683 | 51.88535463 |
| rs183066 | 9 | 94755150 | C | T | 0.19526 | 0.0323944 | 0.653155 | 36.33178111 |
| rs10986104 | 9 | 123786056 | C | T | 0.55487 | 0.0514711 | 0.0662008 | 116.2132347 |
| rs1784692 | 11 | 114078510 | T | C | -0.267948 | 0.0482583 | 0.128626 | 30.82882707 |
| rs17880096 | 22 | 28709214 | G | C | 0.336345 | 0.0566074 | 0.0654099 | 35.30396923 |
| rs62235753 | 22 | 28876649 | C | T | 0.730389 | 0.113288 | 0.0118813 | 41.56622922 |

Note: Chr, chromosome; EAF, effect allele frequency; SE, standard error; SNP, single nucleotide polymorphism.

## **Table S3.** Summary of SNPs used as instrumental variables for VTE in Mendelian Randomization analysis.

| **SNP** | **Chr** | **Position** | **Effect allele** | **Other allele** | **Beta** | **SE** | **EAF** | **F** |
| --- | --- | --- | --- | --- | --- | --- | --- | --- |
| rs10796959 | 1 | 156463126 | G | A | 0.05729 | 0.00967201 | 0.324909 | 35.08521731 |
| rs113079063 | 1 | 169062517 | G | T | 0.345787 | 0.0439115 | 0.00896326 | 62.0098639 |
| rs6025 | 1 | 169549811 | C | T | 0.870092 | 0.0257671 | 0.0199506 | 1140.247859 |
| rs114026832 | 1 | 169738202 | C | A | 0.689277 | 0.0862385 | 0.00203714 | 63.88298286 |
| rs72700111 | 1 | 170221268 | G | A | 0.141735 | 0.0221546 | 0.0407539 | 40.92855289 |
| rs61815209 | 1 | 170946303 | C | A | 0.163117 | 0.0258601 | 0.0294723 | 39.78671207 |
| rs78667607 | 1 | 207098517 | T | G | 0.128524 | 0.0224289 | 0.0400159 | 32.83617168 |
| rs7600986 | 2 | 68409791 | A | T | -0.0619646 | 0.00994128 | 0.71399 | 38.85104359 |
| rs2069901 | 2 | 127417267 | T | C | 0.0662359 | 0.00944394 | 0.360779 | 49.19041031 |
| rs17400325 | 2 | 177701185 | T | C | -0.187157 | 0.0343166 | 0.0198921 | 29.74429263 |
| rs1521800 | 3 | 89952438 | G | T | 0.0608005 | 0.00971504 | 0.319657 | 39.16743356 |
| rs10049088 | 3 | 157079859 | C | T | -0.0543974 | 0.00985863 | 0.312754 | 30.44550273 |
| rs5030062 | 3 | 186736391 | A | C | 0.0527208 | 0.00947784 | 0.347476 | 30.941776 |
| rs2066865 | 4 | 154604124 | G | A | 0.19326 | 0.00965635 | 0.30092 | 400.5511225 |
| rs59409622 | 4 | 154923591 | G | A | -0.136796 | 0.0166495 | 0.0863795 | 67.50631561 |
| rs3756011 | 4 | 186285095 | C | A | 0.200684 | 0.00908151 | 0.428009 | 488.3254584 |
| rs62350309 | 4 | 186356512 | A | G | -0.157998 | 0.0155205 | 0.102196 | 103.6314949 |
| rs73131633 | 5 | 76776245 | G | A | -0.0665331 | 0.0118312 | 0.187298 | 31.62408193 |
| rs2844543 | 6 | 31379427 | A | T | -0.0598 | 0.0091405 | 0.453192 | 42.80184225 |
| rs3011264 | 9 | 132993162 | C | T | 0.0856545 | 0.00944227 | 0.621494 | 82.29009029 |
| rs149244513 | 9 | 133183871 | G | A | 0.188965 | 0.0253615 | 0.0304087 | 55.51532303 |
| rs576123 | 9 | 133268896 | C | T | -0.241601 | 0.00903225 | 0.562333 | 715.493274 |
| rs61848389 | 10 | 69456813 | G | A | 0.10364 | 0.015298 | 0.0929192 | 45.89712641 |
| rs80137017 | 10 | 69477626 | C | T | -0.21012 | 0.0152724 | 0.107811 | 189.2867454 |
| rs10886430 | 10 | 119250744 | A | G | 0.0972505 | 0.0155387 | 0.0928572 | 39.17006766 |
| rs78807356 | 11 | 46575120 | G | T | 0.529333 | 0.0482498 | 0.00662103 | 120.355767 |
| rs5896 | 11 | 46723453 | C | T | 0.103239 | 0.0108433 | 0.221298 | 90.64933686 |
| rs10896706 | 11 | 58183529 | G | A | 0.0642087 | 0.0104053 | 0.24866 | 38.07838688 |
| rs174529 | 11 | 61776489 | T | C | -0.0685403 | 0.00921788 | 0.419336 | 55.28787547 |
| rs1063857 | 12 | 6044348 | A | G | 0.0606393 | 0.00949515 | 0.356358 | 40.78539745 |
| rs703633 | 12 | 103658560 | A | G | -0.0588994 | 0.00912215 | 0.534177 | 41.68956109 |
| rs4135105 | 12 | 103982048 | C | T | 0.411642 | 0.0326594 | 0.0162914 | 158.8630716 |
| rs3211764 | 13 | 113138076 | G | C | 0.0764011 | 0.00923326 | 0.407049 | 68.46822872 |
| rs138269347 | 13 | 113440229 | C | T | -0.14089 | 0.0230673 | 0.0453194 | 37.30497992 |
| rs10498632 | 14 | 91824400 | A | G | 0.0633302 | 0.0093435 | 0.372165 | 45.94122161 |
| rs150331426 | 14 | 94297718 | A | G | 0.195271 | 0.0310916 | 0.0199855 | 39.44476355 |
| rs9933843 | 16 | 30892358 | C | T | -0.0572687 | 0.00934439 | 0.624564 | 37.56061871 |
| rs12445050 | 16 | 81837364 | C | T | 0.0845422 | 0.0133133 | 0.12923 | 40.32511859 |
| rs188337046 | 16 | 88723279 | C | T | 0.147545 | 0.0215954 | 0.0450092 | 46.67953145 |
| rs12445808 | 16 | 89673442 | C | G | -0.0524039 | 0.00933499 | 0.406194 | 31.51370784 |
| rs1560711 | 19 | 10631611 | C | T | 0.125359 | 0.0121786 | 0.823957 | 105.9537434 |
| rs6132582 | 20 | 23247877 | A | G | -0.0803956 | 0.0125929 | 0.161466 | 40.75801757 |
| rs6060308 | 20 | 35206575 | G | A | 0.0984032 | 0.00967124 | 0.318504 | 103.5271174 |

Note: Chr, chromosome; EAF, effect allele frequency; SE, standard error; SNP, single nucleotide polymorphism.

## **Table S4.** Results of mendelian randomization analyses evaluating the causal effect of VTE on PCOS risk.

| **Exposure** | **Outcome** | **Methods** | **No. of SNPs** | **OR (95%CI)** | ***p* value** |
| --- | --- | --- | --- | --- | --- |
| VTE | PCOS | IVW (fixed effects) | 42 | 0.998 (0.904-1.101) | 0.962 |
|  |  | IVW (random effects) | 42 | 0.998 (0.904-1.101) | 0.962 |
|  |  | MR Egger | 42 | 1.025 (0.868-1.211) | 0.768 |
|  |  | Weighted median | 42 | 1.068 (0.92-1.240) | 0.389 |
|  |  | Simple mode | 42 | 0.913 (0.681-1.226) | 0.550 |
|  |  | Weighted mode | 42 | 1.048 (0.902-1.218) | 0.544 |

Note: VTE, venous thromboembolism; PCOS, polycystic ovary syndrome; SNP, single nucleotide polymorphism; IVW, inverse variance weighted; OR, odds ratio; CI, confidence interval.

## **Table S5.** Assessment of Heterogeneity and horizontal pleiotropy in Mendelian Randomization analyses (VTE to PCOS).

| **Exposure** | **Outcome** | **Heterogeneity test (MR-Egger)** | | | **Heterogeneity test (IVW)** | | | **Horizontal pleiotropy test (MR-Egger)** | | **MR-PRESSO** |
| --- | --- | --- | --- | --- | --- | --- | --- | --- | --- | --- |
| Cochran’s Q | Q_df | *p* | Cochran’s Q | Q_df | *p* | Intercept | *p* | *p* |
| VTE | PCOS | 40.48 | 40 | 0.449 | 40.65 | 41 | 0.486 | -0.004 | 0.688 | 0.523 |
